1 Title Page  
2 This is the article title  
3 “The impact of the Little Orange Book on how parents/carers manage symptoms of illness in children:  
4 A mixed methods study”.  
5  
6  
7 Amy Johnson<sup>1</sup>, Kathryn Carruthers<sup>2</sup>, Matthew Breckons<sup>3</sup>, Lynette Harland Shotton<sup>4</sup>.  
8 1 Department of Nursing, Midwifery and Health, Northumbria University, Newcastle Upon Tyne,  
9 United Kingdom  
10 2 Department of Health and Social Care, Teesside University, Middlesbrough, United Kingdom  
11 3 Faculty of Medical Sciences, Newcastle University, Newcastle Upon Tyne, United Kingdom  
12 4 Department of Social Work, Education and Community Wellbeing, Northumbria University,  
13 Newcastle Upon Tyne, United Kingdom  
14  
15 Corresponding author: [lynette.shotton@northumbria.ac.uk](mailto:lynette.shotton@northumbria.ac.uk) [LHS]  
16 Senior author: [amy6.johnson@northumbria.ac.uk](mailto:amy6.johnson@northumbria.ac.uk) [AJ]  
17 These authors contributed equally to this work [KC and MB]  
18

19

## 20 **Abstract**

21 Background: Parental decision-making regarding children’s healthcare represents a complex and  
22 difficult process. While there is general agreement that information and education may play a key role  
23 in supporting self-care and the use of health services, there is potential for information to increase, as  
24 well as reduce anxiety.

25 Objectives: This article summarises the key recommendations of an applied evaluation of a paediatric  
26 health resource, The Little Orange Book.

27 Methods: A mixed-methods approach was used to collect data regarding parental perceptions on the  
28 health resource. Parents and carers in the North-East of England were invited to participate in an  
29 online survey and qualitative interviews. Qualitative data were analysed using thematic analysis and  
30 quantitative data analysed using descriptive statistical analytical methods.

31 Results: One-hundred-and-twenty-eight parents completed the online survey and 16 took part in  
32 interviews. Three themes were identified within the data: *Increasing parental empowerment in*  
33 *managing their child’s health, Equality of Access to Health-based Literature and Barriers and*  
34 *Facilitators to using the Little Orange Book.*

35 Conclusions: The Little Orange Book has the potential to be a useful form of information to support  
36 parents and carers in healthcare decisions. Further development should ensure inclusivity, widen  
37 access and view provision of the information as an opportunity for healthcare professionals to engage  
38 with parents.

39 Keywords: Parent/carer, decision making, childhood symptoms, Little Orange Book.

## 40 **Introduction**

41 For parents/carers of young children, making decisions about their healthcare (where and when) is  
42 complex and research highlights difficulties in making appropriate decisions [1]. Following interviews  
43 with parents of young children [2] Conlon et al. describe a complex decision-making process in which

44 parents sought care for their children when a ‘threshold of capacity for self-management’ was exceeded.  
45 A recent systematic review suggested that pre-disposing factors (socioeconomic status, ethnicity and  
46 race) may influence parental decisions on the use of care which are often based on perceptions of the  
47 urgency of the condition [3] Prompted by dramatic reductions in the use of children’s health services  
48 during the Covid-19 pandemic, research identified several factors feeding into parental decisions  
49 including making sense of risk and understanding information about health service availability [4].  
50 While health information has the potential to cause anxiety [5]. Some suggest that studies examining  
51 health service use focus too much on help-seeking behaviours rather than examination of sense-making  
52 which can create unhelpful, polarised views which classify service use as appropriate or not [6]. Several  
53 studies have concluded that resources to support decision-making or increasing parental knowledge of  
54 health conditions, including self-care, may play an important role in ensuring appropriate healthcare  
55 use [1, 7, 8].

56 The Little Orange Book (LOB) is a paediatric health resource developed by the NHS Newcastle  
57 Gateshead Clinical Commissioning Group (NGCCG) in collaboration with healthcare professionals and  
58 parents/carers. The resource aims to support parents/carers (< 5 years of age) to manage common  
59 childhood illnesses, emergencies, and critical conditions requiring urgent medical attention. The LOB  
60 is freely available from clinical and community settings based in Newcastle and Gateshead in the  
61 Northeast of England and can be downloaded as a digital copy. Initial evaluation of the LOB found that  
62 healthcare professionals and parents/carers viewed the LOB positively, and was considered valuable in  
63 assisting parents/carers to understand more about symptoms of childhood illness and to inform decision-  
64 making about accessing further support and self-care [9].

65 The primary aim of this study was to build on the initial evaluation and to further understand  
66 parent/carer views of the LOB, including elements such as barriers and facilitators to use, suggestions  
67 for improvement, perceived impact on behaviour when faced with making decisions, and managing  
68 symptoms of childhood illness. This article outlines the key findings of a commissioned evaluation of  
69 the LOB and will contribute to knowledge of parental decision-making, distribution of and access to  
70 health information, and considerations for future evaluation methods and research.

71

## 72 **Methods**

### 73 **Design**

74 This study used an explanatory sequential mixed methods design across two phases [10] underpinned  
75 by a pragmatic approach focussed on understand the implications for future information provision.  
76 Phase one was an online survey aimed at understanding broad views and impacts of the LOB. These  
77 initial findings informed the second phase; semi-structured interviews with parents/carers to further  
78 explore the views and experiences of using the LOB. While the survey explored the views of those who  
79 had previously received the LOB and those who had not, this paper will focus on parents/carers who  
80 received the LOB across both phases, the views of those who did not receive the LOB are presented  
81 elsewhere [11].

82 Ethical approval to conduct the evaluation was obtained from Northumbria University Health and Life  
83 Sciences Ethics Committee (reference number: 41385).

### 84 **Participants**

85 Parents/carers from across Newcastle and Gateshead were invited to participate in both phases of the  
86 project. The online survey was publicised via an electronic flier shared with over 300 health and  
87 community services/groups for families and children, 193 nurseries, and via social media groups,  
88 organisational websites, and GP bulletins. A Facebook advertisement was developed and cross-posted  
89 via Instagram and Facebook Messenger. Survey respondents had the opportunity to ‘opt in’ to an  
90 interview to further explore their views and experiences of using the LOB.

91 In total, 128 individuals completed the online survey. Of these 82 had received and used the LOB, 24  
92 had received and not used the LOB, and 22 had not received the LOB (see Table 1).

93

94

95

96 **Table 1. Demographics of survey respondents (N=128)**

|                                             | <b>Received and used the Little Orange Book (N=82)</b>                                                                                                                                                                                               | <b>Received and did not use the Little Orange Book (N=24)</b>                                                               | <b>Did not receive the Little Orange Book (N=22)</b>                                                              |
|---------------------------------------------|------------------------------------------------------------------------------------------------------------------------------------------------------------------------------------------------------------------------------------------------------|-----------------------------------------------------------------------------------------------------------------------------|-------------------------------------------------------------------------------------------------------------------|
| <b>Age</b>                                  | 25-56 years (mean = 35.85, SD = 5.12)                                                                                                                                                                                                                | 24-50 years (mean = 36.96, SD = 6.49)                                                                                       | 28-69 years (mean = 41.00, SD = 10.05)                                                                            |
| <b>Gender</b>                               | Female (95.12%)<br>Male (4.88%)                                                                                                                                                                                                                      | Female (100%)                                                                                                               | Female (86.36%)<br>Male (13.64%)                                                                                  |
| <b>Ethnicity</b>                            | White (93.90%)<br>Black/African/Caribbean/Black British (3.66%)<br>Asian/Asian British (1.22%)<br>Mixed/Multiple Ethnic Groups (1.22%)                                                                                                               | White (91.67%)<br>Asian/Asian British (4.17%)<br>Mixed/Multiple Ethnic Groups (4.17%)                                       | White (86.36%)<br>Asian/Asian British (13.64%)                                                                    |
| <b>Marital Status</b>                       | Married/Civil Partnership (92.68%)<br>Single (6.10%)<br>Separated (1.22%)                                                                                                                                                                            | Married/Civil Partnership (91.67%)<br>Single (8.33%)                                                                        | Married/Civil Partnership (90.91%)<br>Divorced (9.09%)                                                            |
| <b>Number of Children</b>                   | First-time parent (48.78%)<br>Two Children (72.50%)<br>Three Children (22.50%)<br>Four Children (2.50%)<br>More than Four Children (2.50%)                                                                                                           | First-time parent (41.67%)<br>Two Children (69.23%)<br>Three Children (23.08%)<br>Four Children (7.69%)                     | First-time parent (36.36%)<br>Two children (76.92%)<br>Three Children (15.38%)<br>More than Four Children (7.69%) |
| <b>Employment Status</b>                    | Employed full-time (43.90%)<br>Employed part-time (36.59%)<br>Homemaker/Housewife (10.98%)<br>Self-employed (3.66%)<br>Carer (1.22%)<br>Unemployed and not currently looking for work (1.22%)<br>Unable to work (1.22%)<br>Prefer not to say (1.22%) | Employed full-time (54.17%)<br>Employed part-time (33.33%)<br>Homemaker/Housewife (4.17%)<br>Carer (4.17%)<br>Other (4.17%) | Employed full-time (50.00%)<br>Employed part-time (36.36%)<br>Retired (9.09%)<br>Student (4.55%)                  |
| <b>Version of the LOB Received/Accessed</b> | Paper-based copy (56.10%)<br>Online version (10.98%)<br>Both versions (32.93%)                                                                                                                                                                       | Paper-based copy (70.83%)<br>Online version (10.83%)<br>Both versions (8.33%)                                               |                                                                                                                   |

97

98

99

For phase two, sixteen parents/carers took part in individual and group interviews over Microsoft

100 Teams (n=13); face-to-face (n=1), and over the phone (n=2) (see Table 2).

101 **Table 2. Interview participant demographics (N=16)**

|                                      |                                                                                                               |
|--------------------------------------|---------------------------------------------------------------------------------------------------------------|
| <b>Age</b>                           | 25-43 years (mean = 35.19, SD = 4.46)                                                                         |
| <b>Use of the Little Orange Book</b> | Received and used the LOB (n=14)<br>Received but had not used the LOB (n=1)<br>Had not received the LOB (n=1) |
| <b>Ethnicity</b>                     | White (87.50%)<br>Black/African/Black British (6.25%)<br>Asian/Asian British (6.25%)                          |
| <b>Marital Status</b>                | Married/Civil partnership (93.75%)<br>Single (6.25%)                                                          |
| <b>Number of children</b>            | One child (50.00%)                                                                                            |

|                                                                        |                                                                                                                                                    |
|------------------------------------------------------------------------|----------------------------------------------------------------------------------------------------------------------------------------------------|
|                                                                        | Two children (50.00%)                                                                                                                              |
| <b>Employment Status</b>                                               | Employed full-time (50.00%)<br>Employed part-time (37.50%)<br>Homemaker/housewife (6.25%)<br>Unemployed and not currently looking for work (6.25%) |
| <b>Age of Children*</b><br><small>*includes multiple responses</small> | Under one years old (43.75%)<br>Between one and two years old (50.00%)<br>Over three years old (56.25%)                                            |

102

103 This paper presents the views and experiences of the 106 survey recipients and 15 interview participants  
104 who received a version of the LOB.

### 105 **Phase One: Online Survey**

106 The online survey was produced using JISC online surveys and was available for completion between  
107 9<sup>th</sup> April-23<sup>rd</sup> July 2022. The survey included open-text and multiple-choice response options. Survey  
108 respondents were directed to one of three pathways based on their prior receipt and use of the LOB.  
109 Respondents who received and accessed the LOB completed questions about the dissemination of the  
110 resource, previous usage, and possible impact on confidence and decision-making when their child was  
111 unwell. Further questions focused on the design and suggested improvements. For respondents who had  
112 received but not used the LOB, the online survey explored barriers to use, and their use of other sources  
113 of support to assist them in supporting their unwell child. All respondents noted their use of health  
114 services for their child in the previous year, as well as during the Covid-19 pandemic. Survey  
115 respondents had the opportunity to be entered into a prize draw to win £25 voucher.

### 116 **Phase Two: Individual and Group Interviews**

117 Participants who opted for an interview were contacted by a member of the research team. Thirteen  
118 interview participants were recruited from the online survey and three through word of mouth. The  
119 results of Phase One informed the development of the interview topic guide. Interviews further explored  
120 experiences using the Little Orange Book, views on design, impact of the COVID-19 on accessing  
121 health services, and challenges about making decisions regarding their children's health in more depth.  
122 Parents who participated in an individual or group interview received a £25 voucher at completion.

123

## 124 **Data Analysis**

125 Descriptive statistics were calculated from the responses from the phase one online survey and are  
126 presented alongside the qualitative analysis. Open-response questions from the survey and the phase  
127 two qualitative interviews were analysed using deductive thematic analysis [12].

## 128 **Results**

129 Three themes were generated from the individual interviews and the online survey open-question  
130 responses and are outlined below.

### 131 **Increasing parental empowerment in managing their child's health**

132 This theme describes the impact of the LOB in terms of parent's empowerment in managing symptoms  
133 of childhood illness. In doing so, this provides examples of when the LOB was used, the impact on  
134 parent's confidence and the use of health services.

135 Most (76.42%) survey respondents who used the LOB reported this guided healthcare decisions when  
136 their child was unwell. Many parents described using the LOB to manage symptoms of illness that their  
137 child was experiencing, in some instances viewing this as the “*first port of call*” (P009 and P001,  
138 Interview Participants) and an “*invaluable resource to often sleep deprived hormonal parents*” (P023,  
139 Survey Respondent).

140 Parents outlined how they utilised the information about different health conditions and advice  
141 regarding when to seek further support:

142 *“... they're a bit off, and I'm a bit worried about them, but I don't want to just*  
143 *start panicking or ringing 111 or whatever. And that's usually when we go to the*  
144 *orange book... it provides me with what to do next... It's quicker than ringing up*  
145 *111. It's quicker than ringing up your GP. I think it's just, like, almost like a little,*  
146 *like, flow or how-to guide of what to do next.” (P006, Interview Participant)*

147 Whilst seen as generally useful, some parents particularly praised the information provided by LOB  
148 during the COVID-19 pandemic where access to support was often restricted or unavailable.

149 *“And I used the orange book before that, but I think particularly during COVID...  
150 it was it was good because it was much more difficult and more stressful trying to  
151 access healthcare.” (P010, Interview Participant)*

152 First-time parents appeared to value having the LOB as a health resource, particularly those without  
153 access to support networks or concerns surrounding receiving outdated advice. Nearly half (41.78%) of  
154 survey participants who had used the LOB were first-time parents.

155 *“...I thought was brilliant idea and especially as a first time mom...I don't have  
156 my parents, so I can't ask them about things. I can ask my grandma, but obviously  
157 she's older... it's more of like old fashioned values and it might not be up-to-date  
158 with what's recommended to do now... even just to learn about them without  
159 scaring yourself” (P015, Interview Participant)*

160 For parents with multiple children, the LOB could be seen as less useful due to their experience and  
161 knowledge already developed with their older children, however this was unclear in both the survey  
162 and the interviews. One exception to this could be parents who had children with a large age gap.

163 *“It doesn't contain anything of use to me, I got it when I had my third child.”  
164 (P005, Survey Respondent)*

165 Most (85.37%) survey respondents who had used the LOB reported increased confidence in supporting  
166 their child who was experiencing symptoms of illness. Similarly, 89.03% of survey respondents  
167 reported that the LOB had facilitated identifying the most appropriate service to assist their child. This  
168 was further reflected in the qualitative analysis, with some parents reporting using the LOB guided their  
169 use of health care services, facilitated in judging the severity of symptoms, and in some cases, directed  
170 them to the appropriate administration of medication.

171 *“When my little girl had chicken pox, I felt really worried, the book put my mind*  
172 *at rest and I got help from the pharmacy. I bought calamine lotion, I might have*  
173 *given Ibuprofen, but the book advised paracetamol, I shared this advice with*  
174 *friends as it’s not something I knew about.” (P027, Survey Respondent)*

175 Some parents described using the information within the LOB to guide decisions surrounding schools  
176 and nursery settings. However, some parents reported the advice may not align with the procedures at  
177 nurseries.

178 *“I suspect different nurseries will have different policies... I think I remember*  
179 *thinking that what was considered green, amber and red wasn’t necessarily what*  
180 *our nursery was... Because, for some of them you can say can you be off nursery*  
181 *or not... Yes/No. And I think our nursery... I felt like was taking more of a*  
182 *blanket kind of... You can come in if you’ve got a cold, but that was kind of about*  
183 *it.” (P011, Interview Participant)*

184 Other participants described negative experiences or views which could impede usage and reduce their  
185 perception of the LOB.

186 *“I felt that is strongly discouraged seeking NHS assistance and that alone caused*  
187 *concern. I’ll make that judgement myself as a parent. ... I felt it discouraged*  
188 *accessing services at all” (P032, Survey Participant)*

189 *“My child burnt themselves and as per the little orange book, I asked my local*  
190 *pharmacist for advice. Their reaction appeared to be of surprise and why was I*  
191 *asking them. I felt that it was pointless and made me less confident in the advice*  
192 *provided in the book” (P026, Survey Respondent)*

193 Whilst the content of the LOB was seen as valuable, some participants argued the importance of also  
194 using parental instincts regarding their child’s health.

195 *“I wouldn’t say, if something in the book said ‘you don’t need to seek medical*  
196 *advice’ but something in me was telling me I needed to, I still would.” (P014,*  
197 *Interview Participant)*

## 198 **Equality of Access to Health-based Literature**

199 The Equality of Access to Health-based Literature explores the dissemination and visibility of the LOB  
200 and the value of explanations when receiving this resource. The accessibility of health literature is  
201 directly associated with awareness of the resource including how the information is disseminated. As  
202 can be seen from Table 3, most survey respondents received the LOB at a health appointment in the  
203 community.

204 **Table 3. Reports of where survey respondents received the LOB (n=106)**

|                                                                                   |        |
|-----------------------------------------------------------------------------------|--------|
| Health appointment in the community (e.g. GP surgery, midwife or health visitor)  | 64.15% |
| Educational setting (e.g. school, nursery or childcare setting)                   | 8.49%  |
| Health appointment in secondary care (e.g. Outpatients or Accident and Emergency) | 7.55%  |
| Family member or friend                                                           | 7.55%  |
| Accessed online                                                                   | 4.72%  |
| Community centre                                                                  | 1.89%  |
| Can’t remember                                                                    | 3.77%  |
| Other                                                                             | 1.89%  |

205 Some participants felt that the LOB was not easily accessible, lacked visibility, or its importance was  
206 not made clear to them on receipt.

207 *“More focus on it with [health visitor]. I didn’t realise I had it for ages. It wasn’t*  
208 *explained to me at all. I found it with some handouts.” (P096, Survey Respondent)*

209 Conversely, one participant reported that the LOB was highly visible which could indicate variation  
210 between locations.

211           “... I'd said, oh, I felt like I'd been offered this book quite a few times – I don't  
212           know how you missed it” (P004, Interview Participant)

213   Although an online version of the LOB is available, several participants were unaware of its online  
214   availability. Some described how this knowledge would have impacted their use of the LOB and how  
215   they would value the resource.

216           “I would have downloaded it to my phone and just used it all the time... I think it's  
217           good to have the... The paper version of it, but I probably would have used the  
218           digital one... it's just one less thing to have to remember to pack, because you've  
219           always got on you... But now I know that this exists, I'll probably get my Mum to  
220           put it on her phone as well” (P009, Interview Participant)

221   Some participants provided suggestions to increase the awareness and accessibility of the LOB which  
222   included providing the resource with pre-existing resources, such as “The Little Red Book” (personal  
223   child health record). Providing the LOB antenatally was seen as beneficial by some participants to allow  
224   familiarisation with the resource in advance of their child's birth.

225           “Making aware of it to the mum before the baby was born, no time to consult it  
226           during the first month” (P101, Survey Respondent).

227   Nearly half (47.56%) of survey respondents reported that they did not receive an explanation of the  
228   resource when it was provided to them. Crucially, interview participants highlighted that they would  
229   benefit from an explanation of the resource by health and social care staff upon receipt to support  
230   awareness and understanding.

231           “I didn't know that we'd received it... I was sorting out some paperwork in the  
232           bookcase and the pocket that the health visitor had given us – I'd looked through  
233           some of it, but not all of it – she didn't really say what was in there. And I found it  
234           in there and realised what it was and how important it was... It was just 'Here's a  
235           pocket full of some information, if you need it. Have a look through and you can

236 *get in touch with us if you've got any questions. ' But if I'd known what the content*  
237 *of it was and how important it was, I wouldn't have just... ' (P009, Interview*  
238 *Participant)*

239 However, those who had been provided with an explanation found it beneficial.

240 *"My regular health visitor... She provided it along with a few, like, other things...*  
241 *and she talked me through it... You know, it's quite clear... This is you can manage*  
242 *at home. This is you might want to consult someone. And this is an emergency, you*  
243 *know. As well as the helpful tips it gives as well, from time to time... (P002,*  
244 *Interview Participant)*

245 Furthermore, 45% of respondents who had not received the LOB felt distribution via health  
246 professionals (such as midwives, general practitioners, and health visitors) would be preferable. This  
247 can also provide the ability to be reviewed during key points of contact.

248 *"It's provided to the parents without much explanation because they're not gonna*  
249 *take them when they've got a newborn, and they're gonna think that actually, that*  
250 *doesn't affect my child. But then to review the information of the Little Orange*  
251 *Book at the development checks, so such as some people have them at like 3*  
252 *months, six months or a year." (P015, Interview Participant)*

253

## 254 **Barriers and Facilitators to using the Little Orange Book**

255 The final theme identifies the value of peer-to-peer dissemination, credibility and trustworthiness, and  
256 the clear format of information provided. Key barriers included a lack of diversity and the perception  
257 that the sole purpose of the LOB was to prevent access to health services. Recommendation of the book  
258 from peers was both a facilitator to use and dissemination. The majority of survey respondents (92.68%)  
259 who had received and used the LOB reported that they would recommend it to others. Several  
260 participants described sharing the LOB with family members caring for their child or with friends. As

261 a result of peer-to-peer dissemination, the resource was accessed and used more widely beyond the  
262 geographically intended audience.

263 *“I have downloaded the digital format and passed it on to numerous friends who*  
264 *have newborns. It’s very reassuring to have this to hand rather than having to rely*  
265 *on internet search which always seemed to provide a worst-case scenario and*  
266 *panic” (P014, Survey Participant)*

267 In contrast, only 58.33% of the 24 survey respondents who had received but not used the resource would  
268 recommend it to others.

269 Of the 106 survey respondents who received and accessed the LOB, 76.42% used it when their child/ren  
270 were unwell. The affiliation of the resource with the NHS was viewed positively and felt *“more reliable*  
271 *than searching online for answers”* (P053, Survey Respondent). However, some participants queried  
272 whether the content was maintained to ensure it was current and remained accurate while some were  
273 unaware of multiple and/or newer versions of the resource.

274 *“Because it is... You know, medically, it’s come from the NHS... It’s come from a*  
275 *reliable source. And that’s the information that you would get, probably, first if*  
276 *you rang 111. So, yeah... I’ve got masses of confidence in the orange book.”*  
277 *(P001, Interview Participant)*

278 Conversely, despite acknowledging the value of the LOB, one participant queried whether the “tone”  
279 of the resource was intended to act as a deterrent from access to emergency services.

280 *“...I felt like the whole concept of the book was potentially to stop people going to*  
281 *A&E. And I kind of found it useful, otherwise... Because that’s the kind of tone of*  
282 *the NHS, kind of, PR and stuff at the minute. The don’t go to A&E with this. And*  
283 *don’t visit your GP with that. And they’re kind of pushing further on to*  
284 *pharmacists. I thought that was probably the essence of the book in the first*  
285 *place.” (P004, Interview participant)*

286 Several features of the LOB design supported the use of the resource. 87% of participants reported that  
287 they were guided by the traffic light system to guide decision-making, including for acute symptom  
288 management in the presence of long-term conditions. 92.69% of survey respondents who had used the  
289 LOB reported the design to be useful including having tabs to differentiate the sections, although some  
290 participants suggested progression of the design to include physical tabs to support content navigation.

291 *“...the colours are really helpful and that kind of traffic light... system is really*  
292 *helpful. It’s consistent throughout and it helps with that kind of accessibility that I*  
293 *mentioned and that you know, I guess even if the text is a challenge to you, you*  
294 *can see by the colour system like how alarming something is or is not, which is*  
295 *really positive” (P016, Interview Participant)*

296 Furthermore, 82.93% of respondents felt guided by the imagery within the book, finding the visual  
297 content beneficial for symptom identification and management, which was reinforced by qualitative  
298 responses and interviews. However, 47.56% would have preferred additional photographic content,  
299 which some participants acknowledged was available on the NHS website.

300 Several participants raised concerns about a lack of inclusivity and diversity of representation within  
301 the images, which could influence recommendations of the resource. A key example was the meningitis  
302 rash looking visually different on different skin tones and as a result, could be “*life-threatening*” (P132,  
303 Survey respondent).

304 *“The pictures are alright... but I think they should use babies of different races in*  
305 *here. Have a picture of an Asian child, a French.... if you can include fair and*  
306 *brown kids with rashes, to indicate also how does it look like... Instead of fair skin*  
307 *and then the redness of it...” (P008, Interview Participant)*

308 Of the survey respondents who had received and used the LOB, 92.60% felt that the information was  
309 easy to understand. Participants reported that the information was “*simply written*” (P006 Survey  
310 respondent), not too “*medically complex*” (P036, Survey Respondent) and “*concise and relevant*”  
311 (P007, Interview Participant). Conversely, some participants critiqued the amount of information

312 provided but some appreciated the delicate balance with providing detailed information and the size  
313 and usability of the resource.

314 *“...I wouldn’t like to see the book being too bulky, if I’m honest, because it is a*  
315 *quick reference guide. And I think that’s what it should be used for. But I do think*  
316 *there could be a little bit more context to it.” (P003, Interview Participant)*

317 Participants had varied preferences regarding whether the book should be available as a hard copy,  
318 digital version (online) or as a digital application (app). For some participants, a mobile app would be  
319 more accessible and useful however others valued a paper-based resource.

320 *“There’s something about having a hard copy in your hand there, particularly if*  
321 *you’ve got a little one there you know, and you’re dealing with a screaming child*  
322 *and you’re kind of stressed... (P010, Interview Participant)*

323 Additional comments related to the design, format and content included that the resource should  
324 signpost to other resources, such as mental health support services and paediatric first-aid training.

325

## 326 **Discussion and Recommendations for Practice**

327 The findings of this study support assertions that parents have a range of information needs with  
328 regarding their child’s health and healthcare. Parents described a sense-making process in which  
329 feelings of stress and anxiety were present but highlighted the potential of health information to reassure  
330 and signpost to available services. In doing so, the LOB was seen as valuable in supporting parental  
331 and carer decision-making about managing common childhood symptoms of illness. Many participants  
332 reported the LOB had increased their knowledge of common complaints but also helped them to decide  
333 whether there was a need to contact healthcare services; previous research has suggested that these are  
334 two key factors in increasing the appropriate utilisation of health services [1,7,8]. This aligns with the  
335 purpose of the LOB which was intended to help parents and carers use services appropriately. The LOB  
336 was found to particularly benefit new parents and those with an age gap between their children;

337 expectant and new parents have been identified as having specific educational needs which include a  
338 need to understand ‘what is normal’, and reduce levels of anxiety [13]. Here, this suggests there is a  
339 real need for information and support during these key stages.

340 Some participants reported trusting the LOB due to this being an NHS resource. However, there was  
341 also a need to enhance the resource, particularly in relation to improving inclusivity but also  
342 consistency. There were examples where other services, such as pharmacies and nurseries, had different  
343 practices from those outlined in the LOB. This is a key challenge for both healthcare professionals and  
344 the recipients of advice and is known to be increasingly important as the sources of information about  
345 health increase [14]. Whilst it is difficult to understand the full impact of receiving conflicting  
346 information, it is known that this can lead to confusion as well as criticism and mistrust of services [14]  
347 and highlights the need for joined-up policy and information practices. The consequences may be linked  
348 to levels of health literacy and empowerment and so may affect some service users more than others.  
349 What must be noted is that the sample included in this evaluation may not be reflective of the wider  
350 population as 80% of participants were in employment and 65.86% were educated to degree level or  
351 above. This could suggest a link between educational attainment and increased likelihood of using the  
352 LOB, as well as levels of confidence and ability to use a range of sources of information to make  
353 appropriate decisions. Wider literature notes the well-established link between education and health and  
354 the widening health gap between those who are less educated than their peers [15]. Although  
355 educational attainment does not necessarily mean in-depth knowledge of child health, it does increase  
356 the ability to access, understand and use healthcare information [16]. Therefore, it is important that  
357 work is done to ensure that all families have access to relevant information to care for their children.  
358 This should incorporate a range of different approaches including resources such as the LOB and  
359 materials in both hard copy and digital formats, which was noted as beneficial in this evaluation, as well  
360 as the support of key services.

361 Consideration should be given to how resources such as the LOB are distributed but also how parents  
362 are guided in their use. This evaluation suggested that universal services, such as midwives and health  
363 visitors, are well placed to distribute hard copies of the LOB and raise awareness of digital access, and

364 that these interactions may be valuable opportunities for healthcare professionals to signpost parents.  
365 This connects well with their role in supporting children and families. Indeed, in recent years there has  
366 been renewed political emphasis on the importance of supporting parents/carers during the first 1001  
367 days of life and governmental ambitions to provide joined-up support, as well as information for  
368 families when needed [17]. It must be noted that these ambitions are set against a backdrop of challenges  
369 for the health and social care sector in relation to long-term funding and staff shortages. Of particular  
370 note is the impact on key services, such as health visiting, which are tasked with delivering this agenda  
371 in the presence of immense challenges for parents and families, including the cost of living crisis,  
372 increased numbers of parents living with mental health problems and increased prevalence of domestic  
373 abuse and adversity, all posing real risks to the health and wellbeing of babies and young children [18].  
374 Alongside this, there has been increasing recognition that there are insufficient health visitors to meet  
375 the needs of families with a loss of almost 40% of the health visiting workforce since 2015 [18]. This  
376 is perhaps where resources such as the LOB play an important role. Indeed, this evaluation found that  
377 during the pandemic, the LOB was valuable in the context of limited access to services and the message  
378 to stay home, however some parents felt strongly that the LOB was a mechanism to deter the use of  
379 services. This underlines the need for the LOB to be explained and used to compliment, rather than  
380 replace other forms of support.

381 A key strength of this evaluation is that the overwhelming support for the LOB as an intervention was  
382 consistent with findings of a previous evaluation, which included professionals and service users [9].  
383 This suggests that there is a real need for educational and decision-making resources, although as  
384 mentioned previously this is perhaps reflective of the high levels of educational attainment in the  
385 sample. The mixed methods approach allowed us to capture the views of 128 participants and to ask in-  
386 depth questions about the use of the LOB. Whilst the respondents were overwhelmingly mothers, the  
387 sample did include some fathers, foster carers, adoptive parents and parents of minority ethnic origin.  
388 A larger sample still might increase diversity and provide more insight into how the LOB could be  
389 developed and meet the needs of more parents/carers.

390 Resources such as the LOB can provide important information to support parents and carers in decision-  
391 making. However, this evaluation shows that careful thought should be given to how they are  
392 developed, delivered and integrated with other local services to have wider benefit to all parents and  
393 carers. This includes reviewing how inclusive the content is but also conducting evaluations such as  
394 this to determine who is using the resource and how, and identifying groups who may not be accessing  
395 appropriate information resources but have support needs with regards to making decisions about  
396 children's healthcare. The overwhelming support for the LOB suggests that it needs to be more widely  
397 embedded across Newcastle and Gateshead but equally that the resource is likely to be of benefit to  
398 parents and carers beyond these locations.

399

## 400 **References**

- 401 1. Ehrich, K., 2003. Reconceptualizing 'inappropriateness': researching multiple moral positions  
402 in demand for primary healthcare. *Health*; 7(1),pp.109-126.
- 403 2. Conlon C, Nicholson E, De Brún A, McDonnell T, McAuliffe E. Stuff you think you can handle  
404 as a parent and stuff you can't'. Understanding parental health-seeking behaviour when  
405 accessing unscheduled care: A qualitative study. *Health Expect*. 2021 Oct;24(5):1649-1659.  
406 doi: 10.1111/hex.13305. Epub 2021 Jul 6. PMID: 34228872; PMCID: PMC8483205.
- 407 3. Nicholson E, McDonnell T, De Brún A, Barrett M, Bury G, Collins C, Hensey C, McAuliffe E.  
408 Factors that influence family and parental preferences and decision making for unscheduled  
409 paediatric healthcare - systematic review. *BMC Health Serv Res*. 2020 Jul 17;20(1):663. doi:  
410 10.1186/s12913-020-05527-5. PMID: 32680518; PMCID: PMC7366445.
- 411 4. Breckons M, Thorne S, Walsh R, Bhopal S, Owens S, Rankin J (2023) Parental perspectives on  
412 emergency health service use during the first wave of the COVID-19 pandemic in the United  
413 Kingdom: A qualitative study. *PLoS ONE* 18(5): e0285375.  
414 <https://doi.org/10.1371/journal.pone.0285375>
- 415 5. Kubb, C., & Foran, H. M. (2020). Online health information seeking by parents for their  
416 children: systematic review and agenda for further research. *Journal of Medical Internet*  
417 *Research*, 22(8), e19985.
- 418 6. Pope C, McKenna G, Turnbull J, Prichard J, Rogers A. Navigating and making sense of urgent  
419 and emergency care processes and provision. *Health Expect*. 2019 Jun;22(3):435-443. doi:  
420 10.1111/hex.12866. Epub 2019 Jan 10. PMID: 30632242; PMCID: PMC6543158.
- 421 7. Andrews T, Thompson M, Buckley DI, Heneghan C, Deyo R, Redmond N, Lucas PJ, Blair PS,  
422 Hay AD. Interventions to influence consulting and antibiotic use for acute respiratory tract  
423 infections in children: a systematic review and meta-analysis. *PLoS One*. 2012;7(1):e30334.

- 424 doi: 10.1371/journal.pone.0030334. Epub 2012 Jan 27. PMID: 22299036; PMCID:  
425 PMC3267713.
- 426 8. Schneider A, Cabral C, Herd N, Hay A, Kesten JM, Anderson E, Lane I, Beck C, Michie S.  
427 Reducing Primary Care Attendance Intentions for Pediatric Respiratory Tract Infections. *Ann*  
428 *Fam Med*. 2019 May;17(3):239-249. doi: 10.1370/afm.2392. PMID: 31085528; PMCID:  
429 PMC6827624.
- 430 9. INVOLVE North East (2018). The Little Orange Book six month review. The views of health  
431 care professionals and parent/carers. UK.
- 432 10. Creswell, J. W., Klassen, A. C., Plano Clark, V. L., & Smith, K. C. (2011). Best practices for  
433 mixed methods research in the health sciences. Bethesda (Maryland): National Institutes of  
434 Health, 2013, 541-545.
- 435 11. Shotton, L., Johnson, A., Carruthers, K., and Breckons, M. (2022). *Evaluating the Little*  
436 *Orange Book*. Project report, Northumbria University.
- 437 12. Braun, V., & Clarke, V. (2006). Using thematic analysis in psychology. *Qualitative research in*  
438 *psychology*, 3(2), 77-101.
- 439 13. Svensson J, Barclay L, Cooke M. The concerns and interests of expectant and new parents:  
440 assessing learning needs. *J Perinat Educ*. 2006 Fall;15(4):18-27. doi:  
441 10.1624/105812406X151385. PMID: 17768431; PMCID: PMC1804306.
- 442 14. Carpenter, D.M., Geryk, L.L., Chen, A.T., Nagler, R.H., Dieckmann, N.F. and Han, P.K.J. (2016)  
443 Conflicting health information: a critical research need. *Health Expectations*, 19 (6), pp.  
444 1173-1182. doi: [10.1111/hex.12438](https://doi.org/10.1111/hex.12438)
- 445 15. Zajacova, A. and Lawrence, E.M. (2018) The relationship between education and health:  
446 reducing disparities through a contextual approach. *Annu Rev Public Health*. 2018Apr 1: 39:  
447 273-289 doi: [10.1146/annurev-publhealth-031816-044628](https://doi.org/10.1146/annurev-publhealth-031816-044628)
- 448 16. Randall, S. (2022) Health information: are you getting your message across? Available at:  
449 [https://evidence.nihr.ac.uk/collection/health-information-are-you-getting-your-message-](https://evidence.nihr.ac.uk/collection/health-information-are-you-getting-your-message-across/)  
450 [across/](https://evidence.nihr.ac.uk/collection/health-information-are-you-getting-your-message-across/) (accessed 3.10.23).
- 451 17. Department of Health and Social Care (2021) The Best Start for Life. A vision for the 1,001  
452 critical days. Available at:  
453 [https://assets.publishing.service.gov.uk/media/605c5e61d3bf7f2f0d94183a/The\\_best\\_start](https://assets.publishing.service.gov.uk/media/605c5e61d3bf7f2f0d94183a/The_best_start_for_life_a_vision_for_the_1_001_critical_days.pdf)  
454 [for life a vision for the 1 001 critical days.pdf](https://assets.publishing.service.gov.uk/media/605c5e61d3bf7f2f0d94183a/The_best_start_for_life_a_vision_for_the_1_001_critical_days.pdf) (Accessed 3.10.2023).
- 455 18. Institute of Health Visiting (2023) Health visitor survey finds that more babies and young  
456 children are missing out on the government's promise of "the best start in life". Available at:  
457 [https://ihv.org.uk/news-and-views/news/health-visitor-survey-finds-that-more-babies-and-](https://ihv.org.uk/news-and-views/news/health-visitor-survey-finds-that-more-babies-and-young-children-are-missing-out-on-the-governments-promise-of-the-best-start-in-life/)  
458 [young-children-are-missing-out-on-the-governments-promise-of-the-best-start-in-life/](https://ihv.org.uk/news-and-views/news/health-visitor-survey-finds-that-more-babies-and-young-children-are-missing-out-on-the-governments-promise-of-the-best-start-in-life/)  
459 (Accessed 3.10.23).
